# Supplementary material for: Regulating the adaptive immune response to respiratory virus infection
Source: Springer Nature journal article supplement (doi:10.1038/nri3166), 2012-03-09
Supplement: 41577_2012_BFnri3166_MOESM1_ESM.pdf [file 41577_2012_BFnri3166_MOESM1_ESM.pdf]

Supplementary information S1 (table) | **Viruses that induce infections in humans that are primarily localized to the respiratory tract**

| Viruses                | Genome  | Receptors                                                                           | Cellular tropism                       |                                       |
|------------------------|---------|-------------------------------------------------------------------------------------|----------------------------------------|---------------------------------------|
|                        |         |                                                                                     | Primary                                | Secondary                             |
| <b>Influenza virus</b> | (-) RNA | Sialylated glycan                                                                   | Epithelial cells                       | DCs, macrophages, fibroblasts         |
| <b>RSV</b>             | (-) RNA | GAG                                                                                 | Epithelial cells                       | Macrophages, T cells                  |
| <b>Adenovirus</b>      | DNA     | CAR                                                                                 | Epithelial cells                       | Fibroblasts                           |
| <b>Rhinovirus</b>      | (+) RNA | ICAM1                                                                               | Epithelial cells                       | Macrophages                           |
| <b>Coronavirus</b>     | (+) RNA | APN, ACE2                                                                           | Epithelial cells                       | Type I alveolar epithelial cells      |
| <b>Herpes viruses</b>  | DNA     | Heparan sulfate, herpesvirus entry mediator, nectin-1, 3-O sulfated heparan sulfate | Epithelial cells                       | Inflammatory cells, endothelial cells |
| <b>Coxsackie virus</b> | (+) RNA | CARs                                                                                | Epithelial, vascular endothelial cells | –                                     |
| <b>Paramyxovirus</b>   | (-) RNA | Gangliosides, sialylated glycoproteins                                              | Epithelial cells                       | –                                     |

+, positive-stranded; –, negative-stranded; ACE2, angiotensin-converting enzyme 2; APN, aminopeptidase N; CAR, coxsackievirus and adenovirus receptor; DC, dendritic cell; GAG, glycosaminoglycan; ICAM1, intercellular adhesion molecule 1; RSV, respiratory syncytial virus.
